# Supplementary material for: Children can control the expression of masculinity and femininity through the voice
Source: PubMed Central journal article supplement (PMC6689575; doi:10.1098/rsos.190656), 2019-07-17
Supplement: rsos190656supp1.pdf [file rsos190656supp1.pdf]

## Supplementary Methods

### Stereotypically feminine boy and girl characters

#### Nicholas

Nicholas is a boy.  
Nicholas is your age.  
Nicholas really likes playing with:  
**Dolls and kitchen sets**

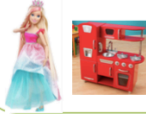

Nicholas really likes playing with:  
**The girls in his class**

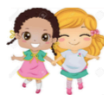

Nicholas, can you repeat the following?

"Hello, it is nice to meet you"

"Where were you yesterday"

"No, I do not want to go"

#### Anna

Anna is a girl.  
Anna is your age.  
Anna really likes playing with:  
**Dolls and kitchen sets**

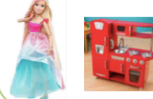

Anna really likes playing with:  
**The girls in her class**

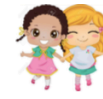

Anna, can you repeat the following?

"Hello, it is nice to meet you"

"Where were you yesterday"

"No, I do not want to go"

31

### Gender-neutral boy and girl characters

#### Ethan

Ethan is a boy.  
Ethan is your age.  
Ethan really likes playing with:  
**Pencils and board games**

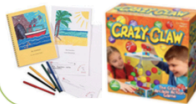

Ethan really likes playing with:  
**the boys and girls in his class**

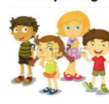

Ethan, can you repeat the following?

"Hello, it is nice to meet you"

"Where were you yesterday"

"No, I do not want to go"

#### Susan

Susan is a girl.  
Susan is your age.  
Susan really likes playing with:  
**Pencils and board games**

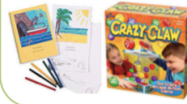

Susan really likes playing with:  
**the boys and girls in her class**

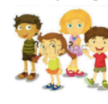

Susan, can you repeat the following?

"Hello, it is nice to meet you"

"Where were you yesterday"

"No, I do not want to go"

### Stereotypically masculine boy and girl characters

#### Jacob

Jacob is a boy.  
Jacob is your age.  
Jacob really likes playing with:  
**Train sets and action toys**

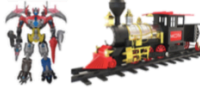

Jacob really likes playing with:  
**the boys in his class**

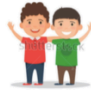

Jacob, can you repeat the following?

"Hello, it is nice to meet you"

"Where were you yesterday"

"No, I do not want to go"

#### Rachel

Rachel is a girl.  
Rachel is your age.  
Rachel really likes playing with:  
**Train sets and action toys**

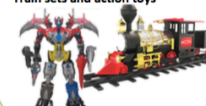

Rachel really likes playing with:  
**the boys in her class**

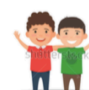

Rachel, can you repeat the following?

"Hello, it is nice to meet you"

"Where were you yesterday"

"No, I do not want to go"
