# Supplementary material for: Children can control the expression of masculinity and femininity through the voice
Source: PubMed Central journal article supplement (PMC6689575; doi:10.1098/rsos.190656), 2019-07-17

# Violin Plots of Fundamental Frequency (F0) and Formant Spacing by Character Type

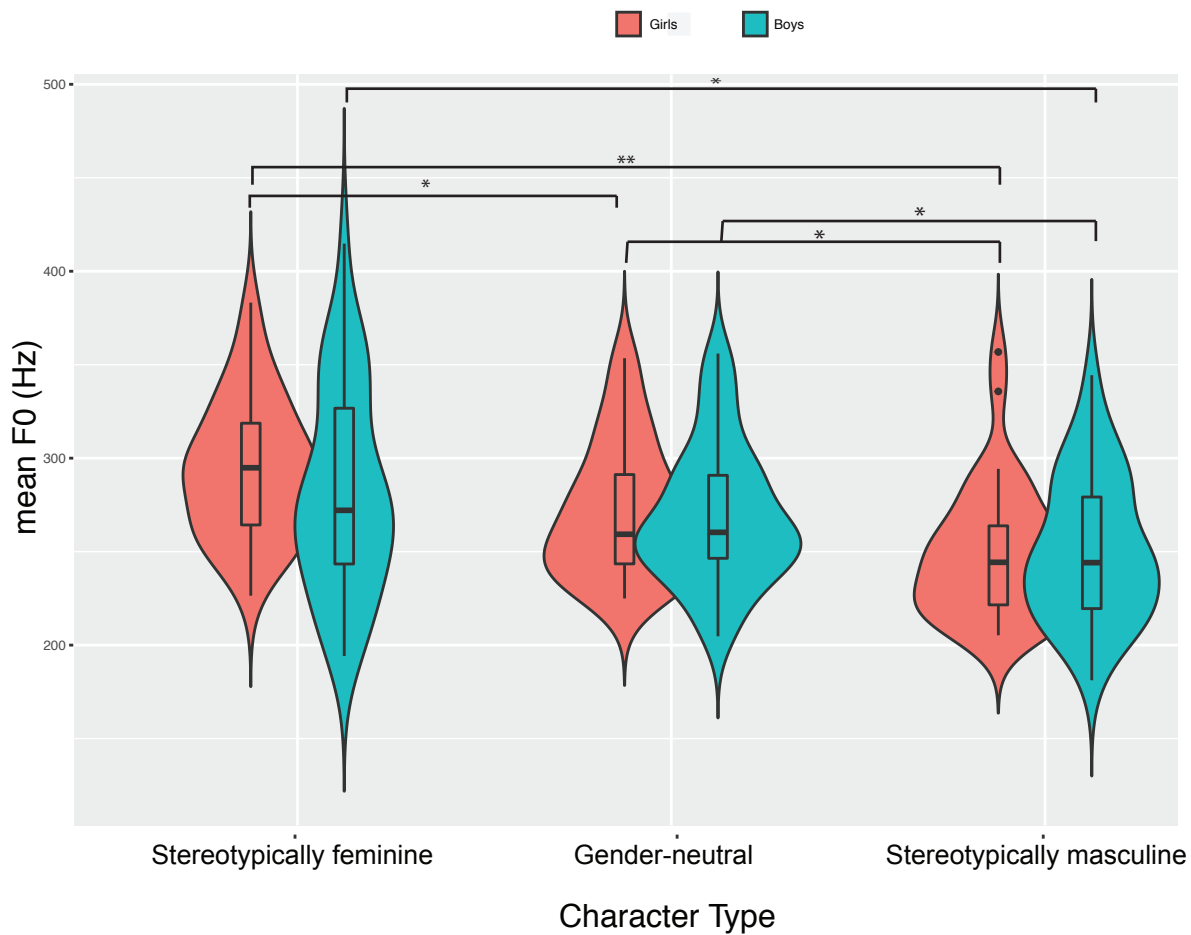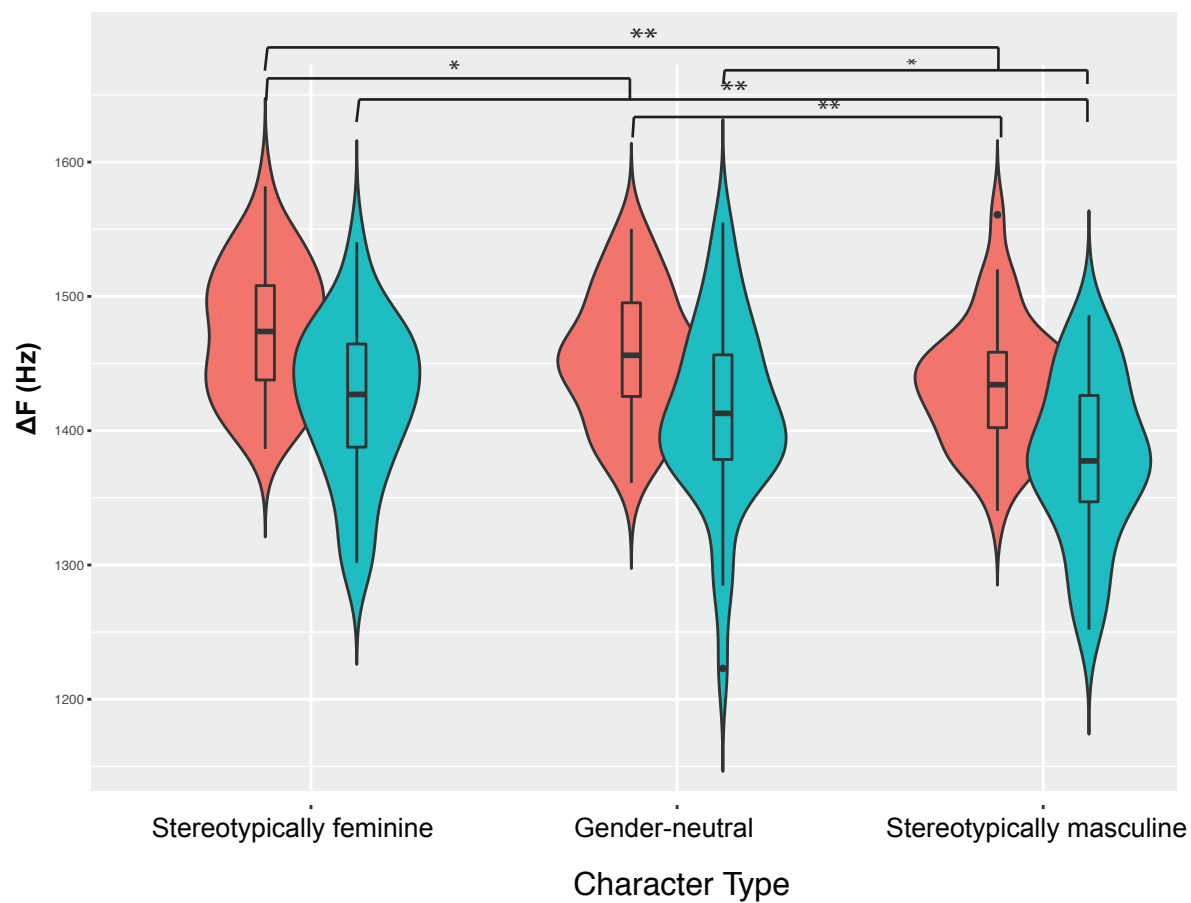

Supplement: rsos190656supp4.pdf [file rsos190656supp4.pdf]
