# Supplementary material for: Children can control the expression of masculinity and femininity through the voice
Source: PubMed Central journal article supplement (PMC6689575; doi:10.1098/rsos.190656), 2019-07-17
Supplement: rsos190656supp5.pdf [file rsos190656supp5.pdf]

### Descriptive statistics for the acoustic parameters

We tested n=72 children in total by year group, 24 in UK Years 1&2 (10 girls, mean age=6.48; SE=.14; 14 boys, mean age = 7.0 SE =.11), 22 in Years 3& 4 (12 girls, mean age= 8.6 SE=.13; 10 boys, mean age = 8.4 SE =.17), and 26 in Years 5&6 (14 girls, mean age= 9.97 SE=.14; 12 boys, mean age =9.7 SE =.12). F0 and DF values (Mean, N, SD, Min, Max) for each character type by sex and year group are reported below.

**Table S1. Children’s F0 and DF values (Mean, N, SD, Min, Max) for each character type (feminine, neutral and masculine) by sex and UK year group.**

|              |      | Feminine  |           |             | Neutral   |           |             | Masculine |           |             |
|--------------|------|-----------|-----------|-------------|-----------|-----------|-------------|-----------|-----------|-------------|
| <i>Girls</i> |      | <i>F0</i> | <i>ΔF</i> | <i>aVTL</i> | <i>F0</i> | <i>ΔF</i> | <i>aVTL</i> | <i>F0</i> | <i>ΔF</i> | <i>aVTL</i> |
| 1-2 Yr Group | Mean | 302.7     | 1509.9    | 11.6        | 283.7     | 1498.6    | 11.7        | 253.1     | 1469.5    | 11.9        |
|              | N    | 10        | 10        | 10          | 10        | 10        | 10          | 10        | 10        | 10          |
|              | SD   | 40.5      | 47.3      | 0.4         | 34.3      | 35.5      | 0.3         | 29.6      | 52.1      | 0.4         |
|              | Min  | 252.1     | 1434.4    | 11.1        | 228.2     | 1433.1    | 11.3        | 207.1     | 1376.3    | 11.2        |
|              | Max  | 383.2     | 1581.9    | 12.2        | 333.7     | 1550.3    | 12.2        | 289.7     | 1560.8    | 12.7        |
| 3-4 Yr Group | Mean | 294.6     | 1462.6    | 12.0        | 270.1     | 1432.3    | 12.2        | 251.5     | 1419.9    | 12.3        |
|              | N    | 12        | 12        | 12          | 12        | 12        | 12          | 12        | 12        | 12          |
|              | SD   | 36.1      | 40.9      | 0.3         | 40.3      | 29.4      | 0.3         | 41.1      | 33.5      | 0.3         |
|              | Min  | 243.4     | 1398.4    | 11.3        | 224.9     | 1381.4    | 11.9        | 213.9     | 1376.3    | 11.9        |
|              | Max  | 365.9     | 1548.0    | 12.5        | 349.9     | 1470.7    | 12.7        | 356.8     | 1474.3    | 12.7        |
| 5-6 Yr Group | Mean | 286.3     | 1455.9    | 12.0        | 262.1     | 1440.6    | 12.2        | 241.4     | 1419.7    | 12.3        |
|              | N    | 14        | 14        | 14          | 14        | 14        | 14          | 14        | 14        | 14          |
|              | SD   | 36.1      | 47.2      | 0.4         | 30.8      | 50.2      | 0.4         | 34.7      | 40.9      | 0.4         |
|              | Min  | 226.4     | 1386.4    | 11.4        | 230.8     | 1361.1    | 11.4        | 205.3     | 1340.3    | 11.7        |
|              | Max  | 343.5     | 1530.3    | 12.6        | 353.5     | 1539.2    | 12.9        | 335.7     | 1498.0    | 13.1        |
| Total        | Mean | 293.6     | 1473.1    | 11.9        | 270.7     | 1453.9    | 12.1        | 248.0     | 1433.6    | 12.2        |
|              | N    | 36        | 36        | 36          | 36        | 36        | 36          | 36        | 36        | 36          |
|              | SD   | 36.9      | 49.7      | 0.4         | 35.3      | 48.3      | 0.4         | 35.1      | 46.7      | 0.4         |
|              | Min  | 226.4     | 1386.4    | 11.1        | 224.9     | 1361.1    | 11.3        | 205.3     | 1340.3    | 11.2        |
|              | Max  | 383.2     | 1581.9    | 12.6        | 353.5     | 1550.3    | 12.9        | 356.8     | 1560.8    | 13.1        |
|              |      |           |           |             |           |           |             |           |           |             |
| <i>Boys</i>  |      | <i>F0</i> | <i>ΔF</i> | <i>aVTL</i> | <i>F0</i> | <i>ΔF</i> | <i>aVTL</i> | <i>F0</i> | <i>ΔF</i> | <i>aVTL</i> |
| 1-2 Yr Group | Mean | 290.4     | 1453.9    | 12.1        | 274.8     | 1452.1    | 12.1        | 273.6     | 1413.9    | 12.4        |
|              | N    | 14        | 14        | 14          | 14        | 14        | 14          | 14        | 14        | 14          |
|              | SD   | 55.6      | 41.4      | 0.3         | 36.0      | 60.3      | 0.5         | 33.0      | 40.4      | 0.4         |
|              | Min  | 217.9     | 1372.7    | 11.4        | 234.3     | 1351.1    | 11.3        | 238.8     | 1345.4    | 11.8        |
|              | Max  | 414.7     | 1540.4    | 12.8        | 356.0     | 1555.0    | 13.0        | 344.4     | 1485.9    | 13.0        |
| 3-4 Yr Group | Mean | 290.8     | 1392.9    | 12.6        | 285.3     | 1408.2    | 12.4        | 250.3     | 1372.0    | 12.8        |
|              | N    | 10        | 10        | 10          | 10        | 10        | 10          | 10        | 10        | 10          |
|              | SD   | 49.6      | 43.4      | 0.4         | 40.8      | 27.8      | 0.2         | 32.9      | 48.6      | 0.5         |

|              |      |       |        |      |       |        |      |       |        |      |
|--------------|------|-------|--------|------|-------|--------|------|-------|--------|------|
|              | Min  | 212.9 | 1308.7 | 12.1 | 226.5 | 1377.8 | 11.9 | 216.2 | 1298.0 | 12.0 |
|              | Max  | 368.6 | 1448.5 | 13.4 | 348.7 | 1466.3 | 12.7 | 299.7 | 1465.2 | 13.5 |
|              | Mean | 262.0 | 1410.3 | 12.5 | 247.8 | 1367.6 | 12.8 | 224.8 | 1344.9 | 13.1 |
|              | N    | 12    | 12     | 12   | 12    | 12     | 12   | 12    | 12     | 12   |
| 5-6 Yr Group | SD   | 57.6  | 71.8   | 0.6  | 26.7  | 77.7   | 0.7  | 35.1  | 69.9   | 0.7  |
|              | Min  | 194.2 | 1301.6 | 11.5 | 204.7 | 1223.0 | 11.7 | 181.2 | 1251.9 | 12.0 |
|              | Max  | 363.9 | 1517.1 | 13.5 | 284.9 | 1496.0 | 14.3 | 300.4 | 1464.4 | 14.0 |
|              | Mean | 281.1 | 1422.4 | 12.3 | 268.7 | 1411.7 | 12.4 | 250.8 | 1379.3 | 12.7 |
|              | N    | 36    | 36     | 36   | 36    | 36     | 36   | 36    | 36     | 36   |
| Total        | SD   | 54.9  | 58.6   | 0.5  | 37.1  | 69.1   | 0.6  | 38.9  | 60.4   | 0.6  |
|              | Min  | 194.2 | 1301.6 | 11.4 | 204.7 | 1223.0 | 11.3 | 181.2 | 1251.9 | 11.8 |
|              | Max  | 414.7 | 1540.4 | 13.5 | 356.0 | 1555.0 | 14.3 | 344.4 | 1485.9 | 14.0 |
